# Supplementary material for: High voltage and efficient bilayer heterojunction solar cells based on an organic–inorganic hybrid perovskite absorber with a low-cost flexible substrate
Source: Royal Society of Chemistry journal article supplement (doi:10.1039/c4cp00298a), 2014-01-01
Supplement: c4cp00298a1.pdf [file c4cp00298a1.pdf]

# Supplementary Information

High voltage and efficient bilayer heterojunction solar cells based on organic-inorganic hybrid perovskite absorber with low-cost flexible substrate

Yi-Fang Chiang<sup>a</sup>, Jun-Yuan Jeng<sup>a</sup>, Mu-Huan Lee<sup>a</sup>, Shin-Rung Peng<sup>a</sup>, Peter Chen<sup>a,b,c\*</sup>,  
Tzung-Fang Guo<sup>a,b\*</sup>, Ten-Chin Wen<sup>d</sup>, Yao-Jane Hsu<sup>e</sup>, Ching-Ming Hsu<sup>f</sup>

<sup>a</sup>) Department of Photonics

<sup>b</sup>) Advanced Optoelectronic Technology Center (AOTC)

<sup>c</sup>) Research Center for Energy Technology and Strategy (RCETS)

<sup>d</sup>) Department of Chemical Engineering

National Cheng Kung University

Tainan 701, Taiwan

<sup>e</sup>) National Synchrotron Radiation Research Center

Hsinchu 300, Taiwan

<sup>f</sup>) Department of Electro-Optical Engineering

Southern Taiwan University

Tainan 701, Taiwan

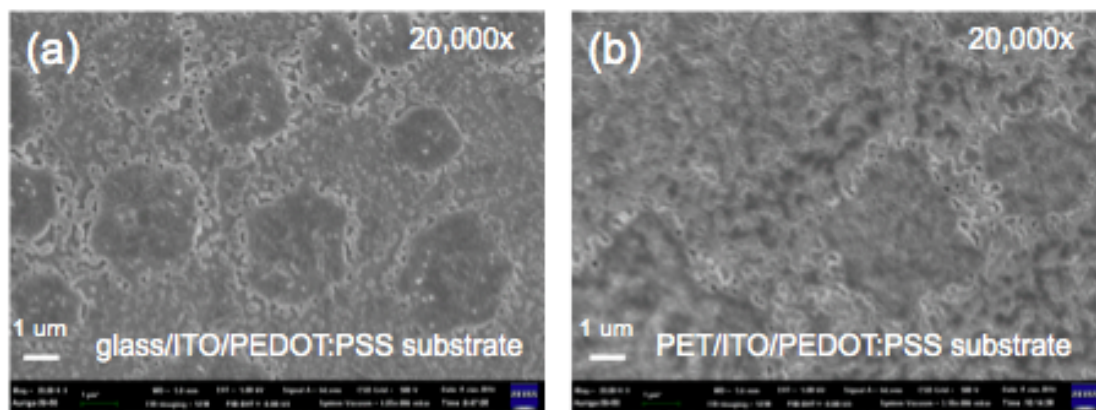

Fig S1. SEM images of  $\text{CH}_3\text{NH}_3\text{PbI}_3$  perovskite film spin-cast (6000 rpm) from  $\gamma$ -butyrolactone solution 14.9 wt% on (a) glass/ITO/PEDOT:PSS substrate and (b) PET/ITO/PEDOT:PSS substrate at the magnification of 20,000x.

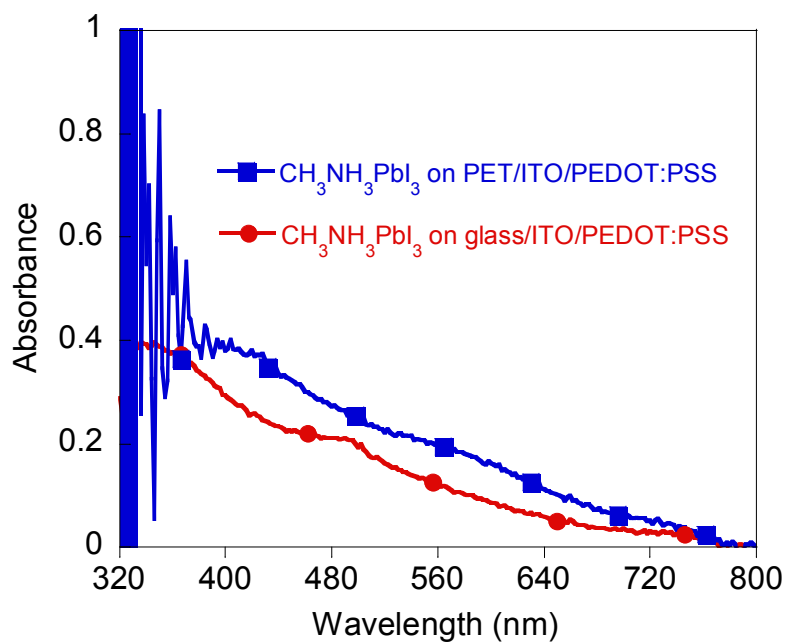

Fig S2. UV-vis absorbance spectra of  $\text{CH}_3\text{NH}_3\text{PbI}_3$  from  $\gamma$ -butyrolactone solution 14.9 wt% spin-cast on glass/ITO/PEDOT:PSS (red line) and PET/ITO/PEDOT:PSS (blue line).
